# Supplementary material for: Predictors of Nocturnal Hypoxemic Burden in Patients Undergoing Elective Coronary Artery Bypass Grafting Surgery
Source: MDPI journal article supplement (doi:10.3390/biomedicines11102665), 2023-09-28
Supplement: s1 [file s1]

# Predictors of Nocturnal Hypoxemic Burden in Patients Undergoing Elective Coronary

## Bypass Grafting Surgery—Online data supplement

### Supplementary tables

**Table S1.** Baseline variables of the sub-analysis population and patients excluded from the sub-analysis or had insufficient data on nocturnal hypoxemia (drop-out population). Data are presented as absolute and relative frequencies or mean  $\pm$  standard deviation.

|                                    | overall        | sub-analysis population | drop-out population | p-value              |
|------------------------------------|----------------|-------------------------|---------------------|----------------------|
| n (%)                              | 600 (100)      | 429 (100)               | 171 (100)           |                      |
| Age, years                         | 66.6 $\pm$ 8.6 | 66.6 $\pm$ 8.5          | 66.7 $\pm$ 9.1      | 0.827 <sup>T</sup>   |
| Male sex, n (%)                    | 516 (86)       | 368 (86)                | 148 (86)            | 0.806 <sup>Chi</sup> |
| Body mass index, kg/m <sup>2</sup> | 28.8 $\pm$ 4.8 | 28.6 $\pm$ 4.4          | 29.4 $\pm$ 6.0      | 0.071 <sup>T</sup>   |
| Impaired LV ejection fraction <55% | 115 (30)       | 98 (29)                 | 17 (33)             | 0.614 <sup>Chi</sup> |

NT-pro BNP: N-terminal pro-brain natriuretic peptide. <sup>T</sup> Student's t-test; <sup>Chi</sup> Chi-square test.

**Table S2.** Baseline variables of the sub-analysis population and patients excluded from the sub-analysis or had insufficient data on nocturnal hypoxemia. Data are presented as absolute and relative frequencies or mean  $\pm$  standard deviation.

|                                    | overall        | sub-analysis population | withdrawal population | patients with insufficient data on nocturnal hypoxemia | p-value              |
|------------------------------------|----------------|-------------------------|-----------------------|--------------------------------------------------------|----------------------|
| n (%)                              | 600 (100)      | 429 (100)               | 101 (100)             | 70 (100)                                               |                      |
| Age, years                         | 66.6 $\pm$ 8.6 | 66.6 $\pm$ 8.5          | 66.6 $\pm$ 9.7        | 66.9 $\pm$ 8.2                                         | 0.951 <sup>A</sup>   |
| Male sex, n (%)                    | 516 (86)       | 368 (86)                | 89 (88)               | 59 (84)                                                | 0.754 <sup>Chi</sup> |
| Body mass index, kg/m <sup>2</sup> | 28.8 $\pm$ 4.8 | 28.6 $\pm$ 4.4          | 30.1 $\pm$ 7.0        | 28.7 $\pm$ 4.9                                         | 0.052 <sup>A</sup>   |
| Impaired LV ejection fraction <55% | 115 (30)       | 98 (29)                 | 7 (35)                | 10 (31)                                                | 0.845 <sup>Chi</sup> |

NT-pro BNP: N-terminal pro-brain natriuretic peptide. Chi-square test; <sup>A</sup> ANOVA test.



|                                           |            |                         |            |            |             |                          |                          |                                 |
|-------------------------------------------|------------|-------------------------|------------|------------|-------------|--------------------------|--------------------------|---------------------------------|
| LV ejection fraction, %                   | 59.5 ± 8.1 | 45.4 ± 9.9 <sup>#</sup> | 59.2 ± 7.9 | 61.5 ± 7.6 | 55.0 ± 12.7 | 52.1 ± 12.4 <sup>#</sup> | 45.5 ± 14.3 <sup>#</sup> | <b>&lt;0.001</b> <sup>A</sup>   |
| Impaired LV ejection fraction <55%, n (%) | 7 (11)     | 0 (0)                   | 0 (0)      | 2 (10)     | 3 (11)      | 10 (17)                  | 9 (32)                   | 0.056 <sup>Chi</sup>            |
| Left atrial enlargement, n (%)            | 35 (35)    | 5 (56)                  | 3 (27)     | 20 (49)    | 18 (37)     | 49 (59) <sup>#</sup>     | 24 (83) <sup>#</sup>     | <b>&lt;0.001</b> <sup>Chi</sup> |

#### Laboratory data

|                                 |                   |                               |                   |                   |                   |                              |                               |                                |
|---------------------------------|-------------------|-------------------------------|-------------------|-------------------|-------------------|------------------------------|-------------------------------|--------------------------------|
| NT-proBNP, pg/ml                | 159 (70; 472)     | 1961 (938; 3153) <sup>#</sup> | 153 (88; 257)     | 153 (79; 409)     | 254 (94; 477)     | 453 (128; 1619) <sup>#</sup> | 1924 (996; 2782) <sup>#</sup> | <b>&lt;0.001</b> <sup>KW</sup> |
| Hemoglobin, g/dl                | 14.2 (13.3; 15.0) | 14.3 (11.2; 15.2)             | 13.8 (12.0; 15.3) | 14.5 (13.0; 15.3) | 14.2 (13.4; 14.8) | 13.9 (12.9; 14.6)            | 14.2 (12.7; 15.9)             | 0.805 <sup>KW</sup>            |
| Hb1Ac, g/dl                     | 5.7 (5.5; 6.2)    | 5.8 (5.3; 6.3)                | 5.8 (5.4; 7.4)    | 6.1 (5.6; 6.6)    | 5.8 (5.5; 6.4)    | 5.9 (5.5; 6.7)               | 6.1 (5.7; 6.9)                | 0.088 <sup>KW</sup>            |
| Creatinine, mg/dl               | 0.95 (0.81; 1.05) | 0.89 (0.81; 1.12)             | 0.97 (0.85; 1.24) | 0.94 (0.82; 1.09) | 0.94 (0.84; 1.07) | 1.00 (0.85; 1.22)            | 1.00 (0.88; 1.18)             | 0.198 <sup>KW</sup>            |
| GFR, ml/min/1.73 m <sup>2</sup> | 81 (71; 91)       | 89 (55; 91)                   | 91 (53; 94)       | 82 (65; 92)       | 81 (68; 89)       | 76 (55; 89)                  | 74 (61; 90)                   | 0.132 <sup>KW</sup>            |

#### Preoperative information on surgical treatment

|                                |          |          |          |          |                    |          |          |                             |
|--------------------------------|----------|----------|----------|----------|--------------------|----------|----------|-----------------------------|
| CABG and valve surgery, n (%)  | 29 (22)  | 8 (42)   | 1 (7)    | 14 (28)  | 4 (6) <sup>#</sup> | 27 (25)  | 12 (30)  | <b>0.006</b> <sup>Chi</sup> |
| Number of coronary stenoses, n | 3 (3; 4) | 4 (3; 6) | 4 (3; 5) | 4 (3; 5) | 4 (3; 5)           | 3 (3; 5) | 3 (3; 5) | 0.173 <sup>KW</sup>         |
| Number of grafts, n            | 2 (2; 3) | 2 (2; 3) | 2 (2; 3) | 3 (1; 3) | 3 (2; 3)           | 2 (2; 3) | 3 (2; 3) | 0.514 <sup>KW</sup>         |

<sup>A</sup> ANOVA test; <sup>Chi</sup> Chi-square test; <sup>KW</sup> Kruskal-Wallis-test. NYHA: New York Heart Association; TIA: transient ischemic attack; LV: left ventricular; NT-proBNP: N-terminal pro-brain natriuretic peptide; HbA1c: glycosylated Hemoglobin, Type A1C; GFR: glomerular filtration rate; CABG: coronary artery bypass grafting. \* n=363; NT-proBNP ≥450 pg/mL (patients <50 years of age), ≥900 pg/mL (patients ≥50 and <75 years of age) or ≥1800 pg/mL (patients ≥75 years of age); <sup>†</sup> glomerular filtration rate <60 ml/min/1.73 m<sup>2</sup>; <sup>‡</sup> hemoglobin <12 g/dl (women) or hemoglobin <13 g/dl (men); <sup>#</sup> post hoc analysis <0.05, compared to patient group with no heart failure, no mild to moderate COPD, no obesity, no SDB.

**Table S4.** Nocturnal respiration data of the study population of patients (n = 429) without and with an elevated nocturnal hypoxemic burden index. Data are presented as median (interquartile range) or absolute and relative frequencies.

|                                                                         | no heart failure,<br>no mild to<br>moderate<br>COPD,<br>no obesity, no<br>SDB | heart failure   | mild to<br>moderate<br>COPD | obesity         | SDB               | 2/4<br>comorbidities | ≥3/4<br>comorbidities | p-value               |
|-------------------------------------------------------------------------|-------------------------------------------------------------------------------|-----------------|-----------------------------|-----------------|-------------------|----------------------|-----------------------|-----------------------|
| Total recording time, min                                               | 487 (471; 501)                                                                | 484 (453; 494)  | 477 (465; 486)              | 484 (466; 501)  | 491 (465; 507)    | 485 (463; 507)       | 488 (471; 504)        | 0.508 <sup>KW</sup>   |
| Apnea hypopnea index, per hour                                          | 6.5 (3.7; 10.7)                                                               | 7.9 (4.6; 11.3) | 5.4 (3.4; 11.2)             | 9.7 (6.5; 11.6) | 22.0 (17.9; 34.7) | 23.9 (19.0; 33.4)    | 28.7 (21.3; 43.7)     | <0.001 <sup>KW</sup>  |
| Obstructive apnea index, per hour                                       | 1.2 (0.4; 2.2)                                                                | 0.8 (0.1; 1.8)  | 1.0 (0.5; 1.8)              | 1.1 (0.5; 2.1)  | 4.9 (2.4; 11.5)   | 4.0 (1.5; 9.2)       | 4.9 (1.8; 12.0)       | <0.001 <sup>KW</sup>  |
| Central apnea index, per hour                                           | 0.9 (0.3; 2.2)                                                                | 1.4 (0.1; 2.5)  | 1.6 (0.4; 3.4)              | 0.8 (0.2; 2.8)  | 6.2 (2.4; 13.7)   | 5.7 (1.8; 13.1)      | 4.9 (0.4; 23.3)       | <0.001 <sup>KW</sup>  |
| Oxygen desaturation index, per hour                                     | 4.8 (1.9; 8.4)                                                                | 7.4 (3.1; 11.2) | 4.5 (2.1; 10.5)             | 7.4 (5.4; 9.4)  | 17.8 (14.5; 29.8) | 21.3 (15.1; 30.8)    | 25.6 (17.0; 42.1)     | <0.001 <sup>KW</sup>  |
| Mean SpO <sub>2</sub> , %                                               | 93 (92; 94)                                                                   | 93 (92; 94)     | 90 (92; 93)                 | 92 (91; 93)     | 93 (91; 94)       | 92 (90; 93)          | 91 (89; 92)           | <0.001 <sup>KW</sup>  |
| Min SpO <sub>2</sub> , %                                                | 85 (82; 88)                                                                   | 85 (83; 88)     | 83 (81; 86)                 | 82 (79; 85)     | 82 (78; 84)       | 80 (75; 84)          | 76 (73; 83)           | <0.001 <sup>KW</sup>  |
| T90/TRT, %                                                              | 1.6 (0.2; 11.3)                                                               | 2.4 (0.2; 10.6) | 5.0 (2.3; 35.9)             | 7.6 (2.4; 20.1) | 9.9 (2.4; 23.9)   | 12.6 (5.5; 31.2)     | 34.8 (10.8; 65.5)     | <0.001 <sup>KW</sup>  |
| T90 <sub>desaturation</sub> /TRT, %                                     | 0.6 (0.1; 2.6)                                                                | 0.6 (0.1; 3.6)  | 1.4 (0.6; 6.2)              | 1.6 (0.7; 4.8)  | 6.3 (1.5; 11.9)   | 7.6 (3.2; 14.4)      | 13.6 (7.7; 28.4)      | <0.001 <sup>KW</sup>  |
| T90 <sub>non-specific</sub> /TRT, %                                     | 0.4 (0.0; 7.5)                                                                | 0.9 (0.0; 6.6)  | 4.1 (0.9; 30.7)             | 6.8 (0.7; 18.9) | 1.4 (0.1; 10.0)   | 3.7 (0.3; 14.8)      | 16.7 (1.4; 39.4)      | <0.001 <sup>KW</sup>  |
| Sleep-disordered breathing<br>(Apnea-hypopnea index ≥15/hour), n<br>(%) | 0 (0)                                                                         | 0 (0)           | 0 (0)                       | 0 (0)           | 63 (100)          | 95 (87)              | 40 (100)              | <0.001 <sup>Chi</sup> |
| Obstructive sleep apnea<br>(Apnea-hypopnea index ≥15/hour), n<br>(%)    | 0 (0)                                                                         | 0 (0)           | 0 (0)                       | 0 (0)           | 27 (43)           | 37 (34)              | 18 (45)               |                       |
| Central sleep apnea<br>(Apnea-hypopnea index ≥15/hour), n<br>(%)        | 0 (0)                                                                         | 0 (0)           | 0 (0)                       | 0 (0)           | 36 (57)           | 58 (53)              | 22 (55)               |                       |

<sup>Chi</sup> Chi-square test; <sup>KW</sup> Kruskal-Wallis-test. TRT: artefact-free total recording time.

## Supplementary figure

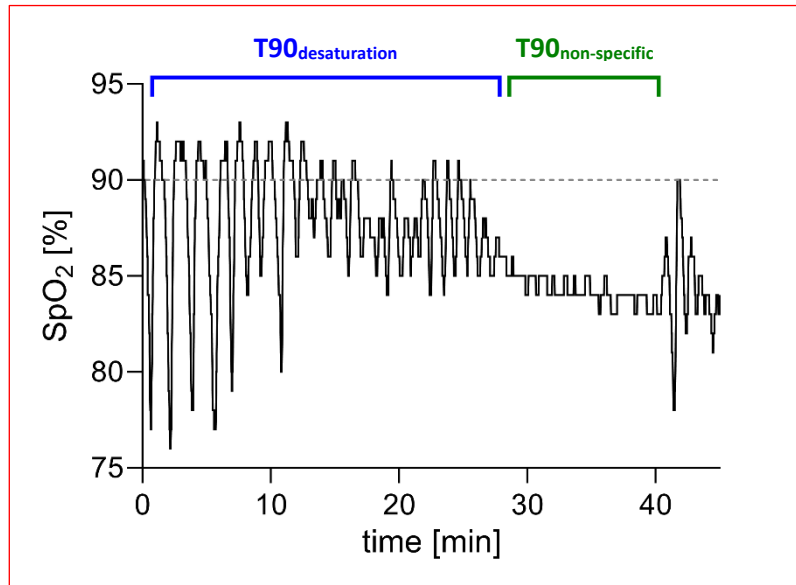

**Figure S1.** Descriptive diagram of T90 with acute oxygen desaturation events accompanied by resaturation (T90<sub>desaturation</sub>) and T90 associated with non-specific drifts in SpO<sub>2</sub> or incomplete resaturation (T90<sub>non-specific</sub>) as obtained from raw oximetry data with the use of a custom MATLAB software algorithm.

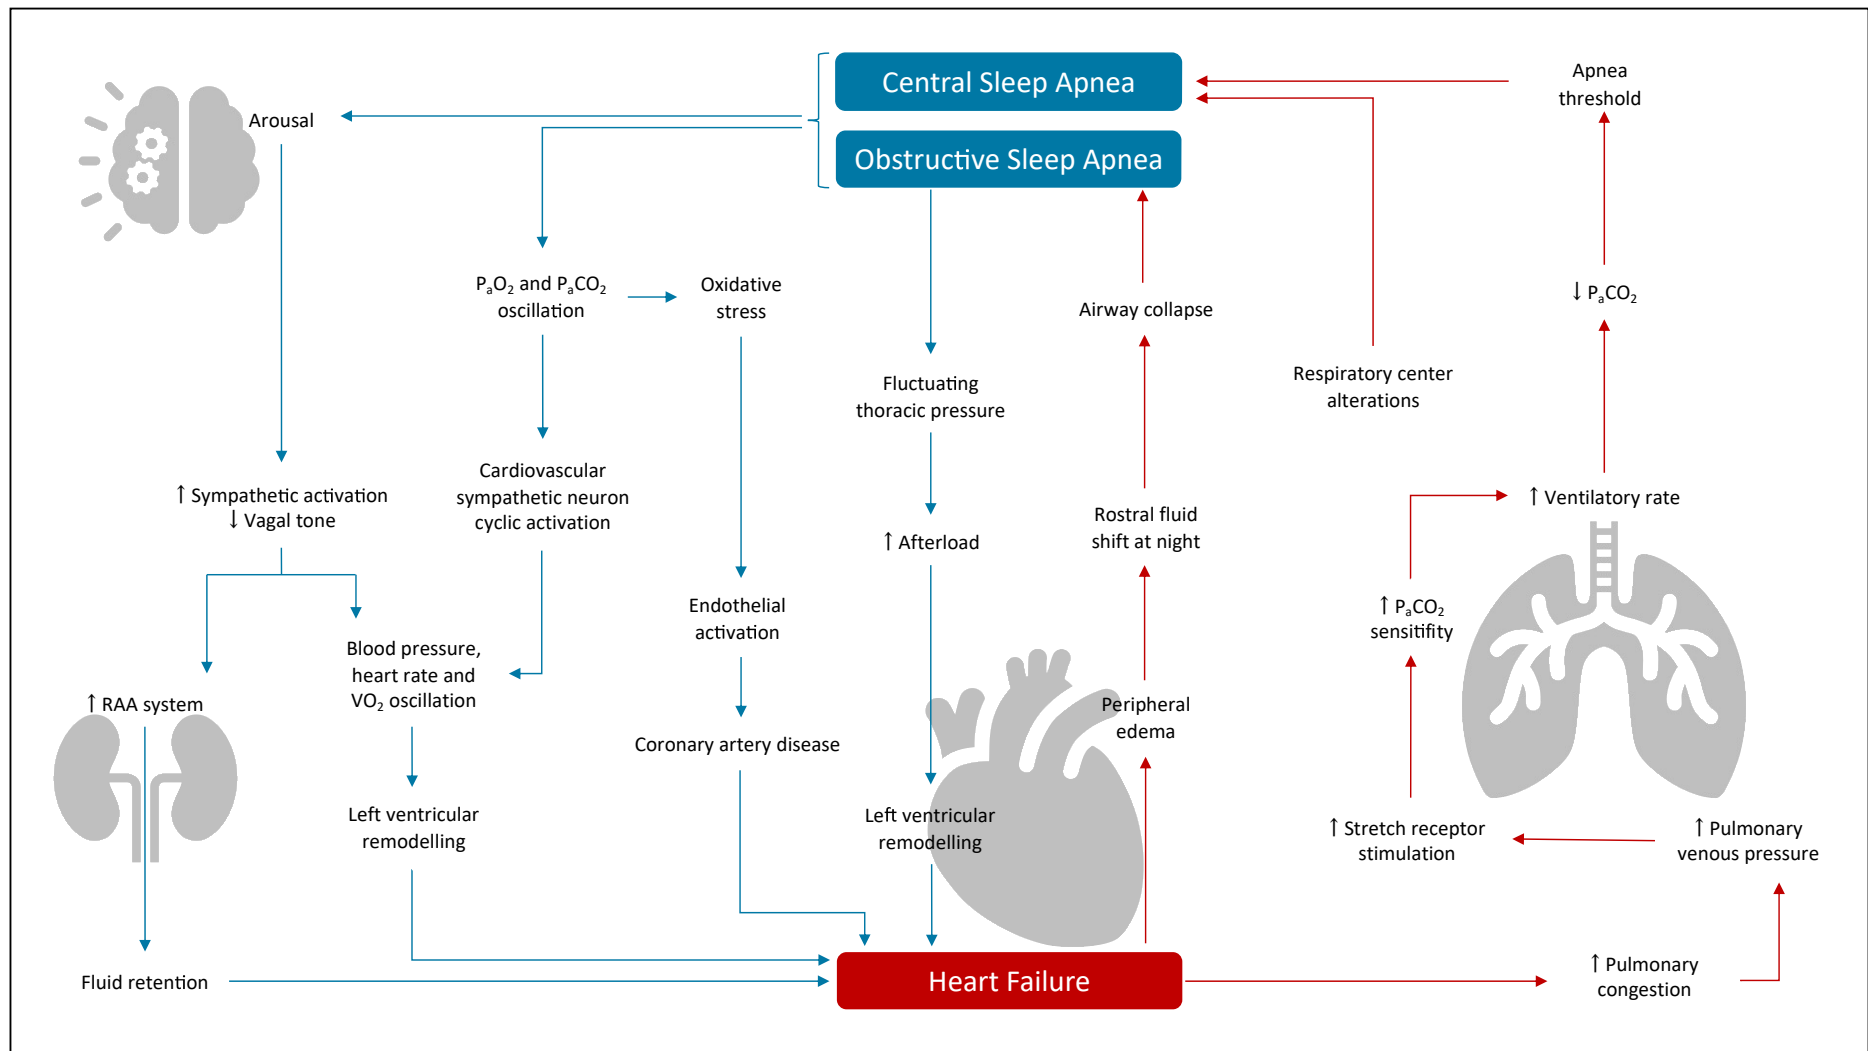

**Figure S2.** Schematic model depicting the relationship between sleep apnea and heart failure (illustration modified from Parati G et al. 2016)<sup>2</sup>. RAA: Renin-angiotensin-aldosterone;  $VO_2$ : oxygen consumption.
